# Supplementary material
Source: MDPI journal article supplement (https://www.mdpi.com/2073-4441/9/6/392)

# Supplementary

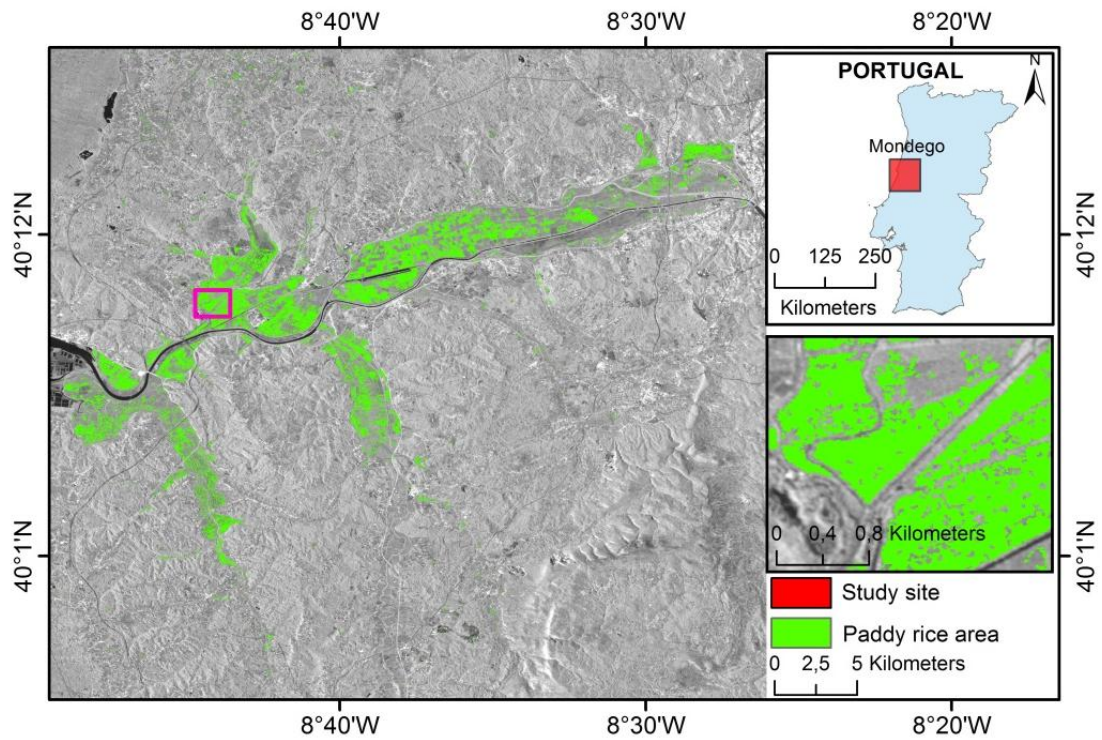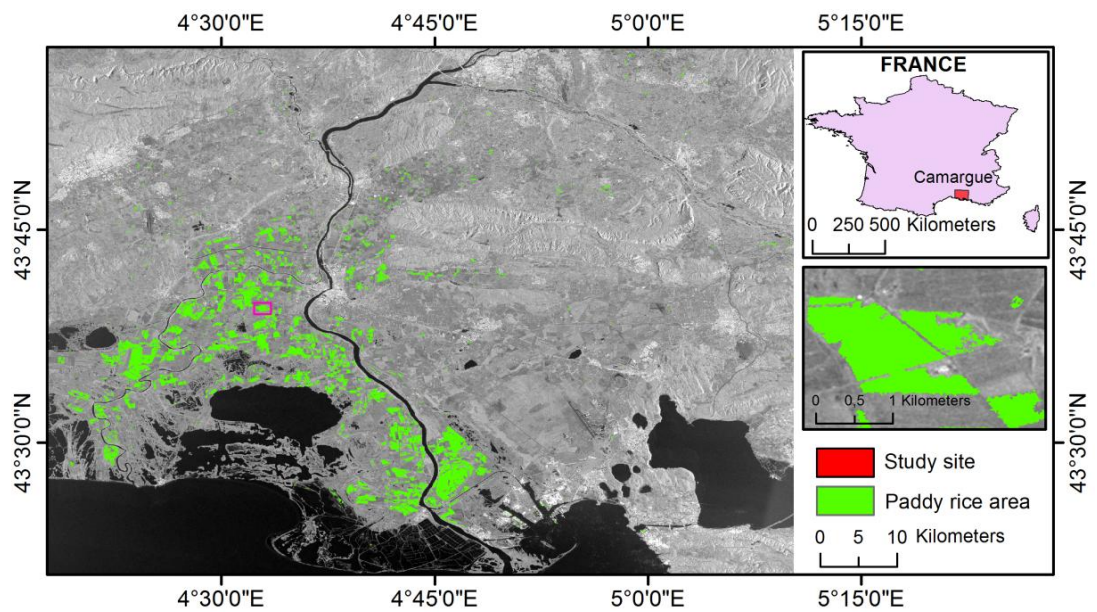

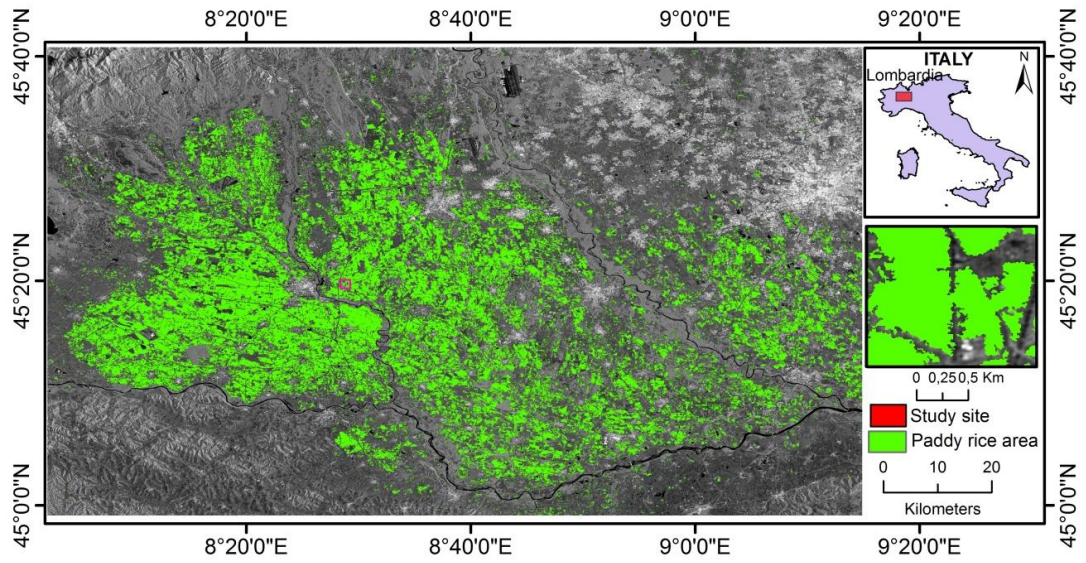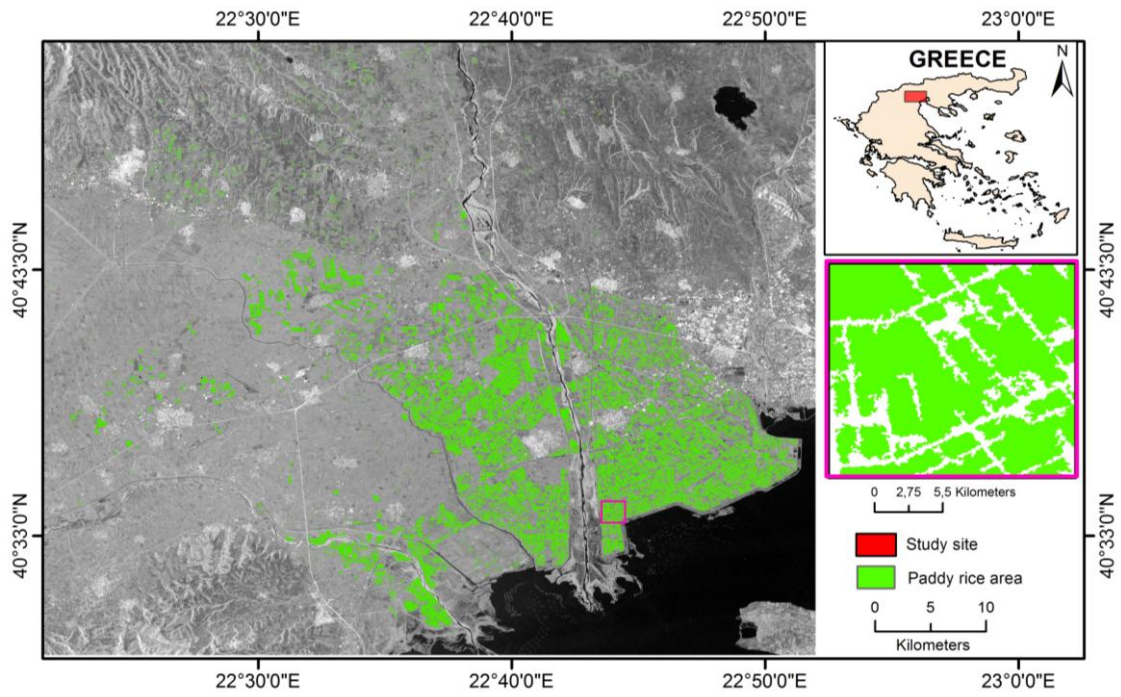

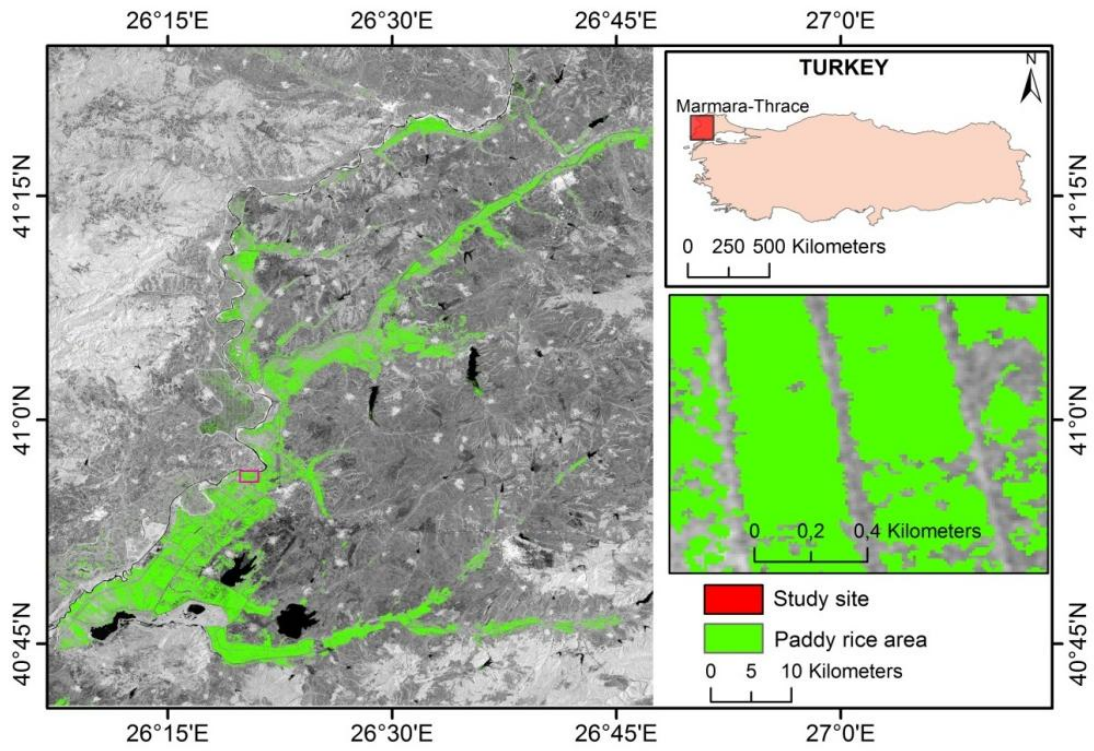

Figure S1. Rice cropland map of 8 study sites in the Mediterranean region.

Supplement: s1 [file s1]
